# Supplementary material
Source: PubMed Central journal article supplement (PMC6202165)
Supplement: NIHMS979627-supplement-313131_Online.pdf [file NIHMS979627-supplement-313131_Online.pdf]

## Supplemental Material

### Online Table I

| Parameter   | EX+PL             | EX+BR               |
|-------------|-------------------|---------------------|
| Oxy a       | $1.33 \pm 0.047$  | $5.87 \pm 0.099^*$  |
| Oxy b       | $5.18 \pm 1.310$  | $16.40 \pm 1.053^*$ |
| Deoxy $Y_0$ | $-0.16 \pm 0.044$ | $-3.5 \pm 0.412^*$  |
| Deoxy a     | $0.41 \pm 0.231$  | $4.07 \pm 0.111^*$  |
| Deoxy b     | $0.13 \pm 0.125$  | $0.06 \pm 0.003$    |

Parameter outputs from the change in non-linear regression of Oxy and Deoxy hemoglobin content from the pre and post treatment NIRS spectra.

### Online Figure I

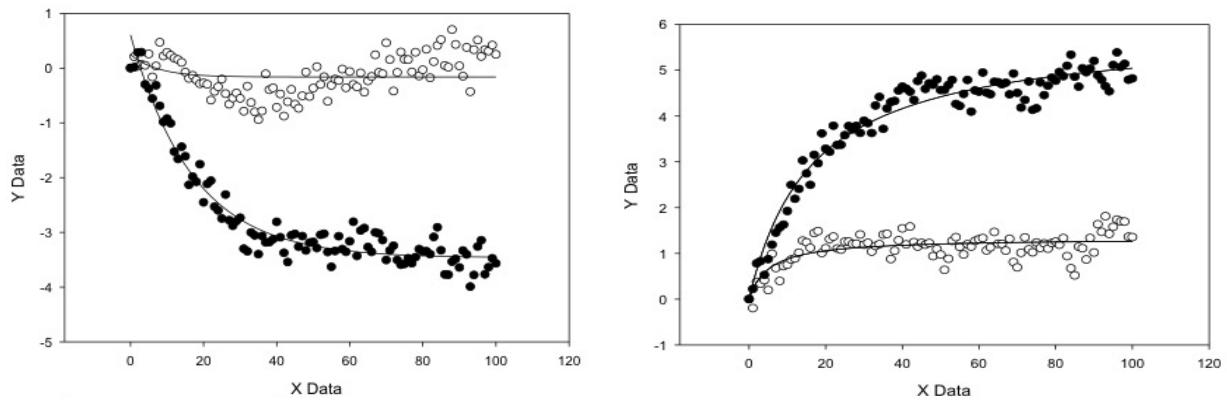

Near infra-red spectra for changes over time in deoxy (left) and oxy (right) haemoglobin curves fitted to the regression equations  $f = Y_0 + a \cdot e^{(b \cdot x)}$  and  $f = a \cdot x / (b + x)$  respectively. EX+PL (clear bars/circles) or EX+BR (black bars/circles).
